# Supplementary material
Source: PubMed Central journal article supplement (PMC2981543)

**Figure S1. Analysis of hematopoietic cells from *mpx:eGFP* transgenic animals by flow cytometry**

Contour plots show the regional separation of major blood cell lineages by their light-scatter characteristics: FSC<sup>lo</sup>SSC<sup>int-hi</sup> (R1, Erythroid gate), FSC<sup>int</sup>SSC<sup>lo</sup> (R2, Lymphoid gate), FSC<sup>hi</sup>SSC<sup>lo</sup> (R3, Precursor gate), FSC<sup>hi</sup>SSC<sup>int</sup> (R4, Myeloid gate), FSC<sup>hi</sup>SSC<sup>hi</sup> (R5, Eosinophil gate). Histograms indicate the abundance of GFP<sup>+</sup> cells in each gate. A) A representative scatter profile for WKM. *mpx<sup>hi</sup>* cells were only present in the R4 gate (50.2% ±11.4 pure), n = 10. B) A representative scatter profile for IPEX. The few *mpx<sup>hi</sup>* cells observed localized to the R4 gate (4.6% ±6.1 pure), n = 10.

**Figure S2. Morphological characterization of TB<sup>+</sup> cells**

Cells within the myelomonocyte gate (FSC<sup>hi</sup>SSC<sup>int</sup>) were FACS sorted (purity >95%) from the gut. Top row shows cells that stained positively with toluidine blue (TB, purple precipitate). Bottom row shows the ultrastructural properties of mast cells by TEM within the myelomonocyte fraction. Scale bar = 5 μm; Nucleus (N).

Figure S1

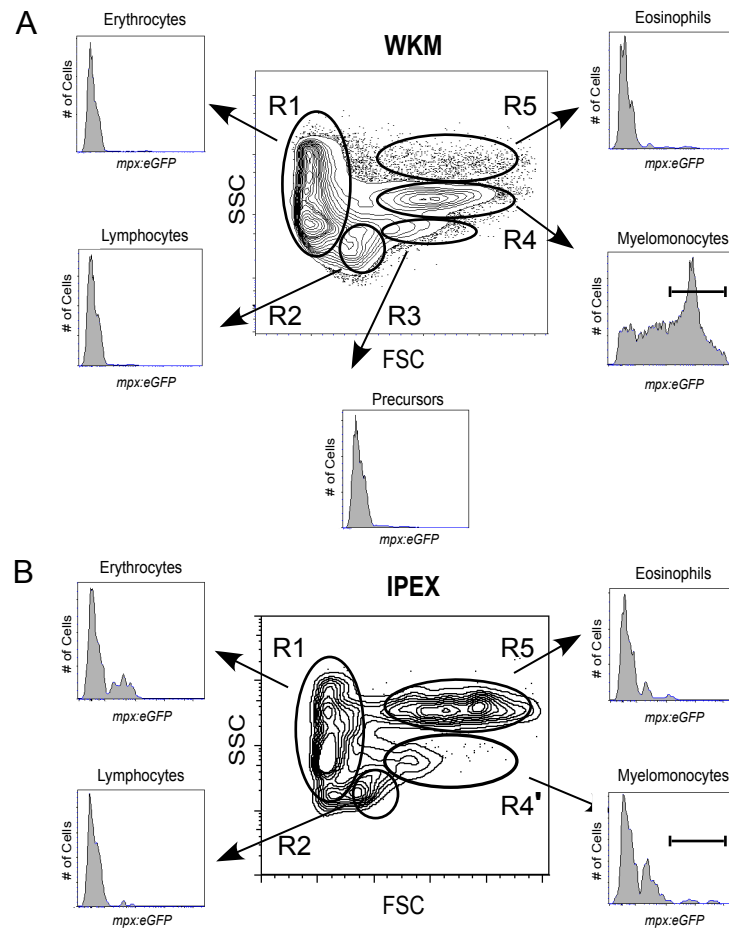

Figure S2

A.

TB

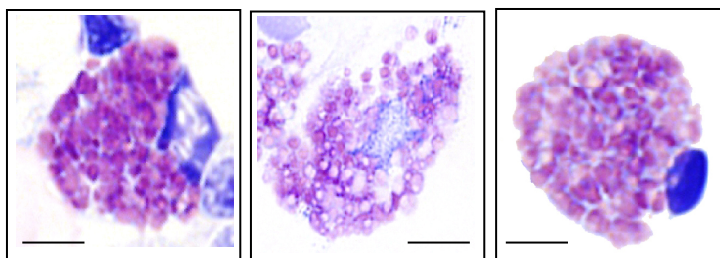

B.

TEM

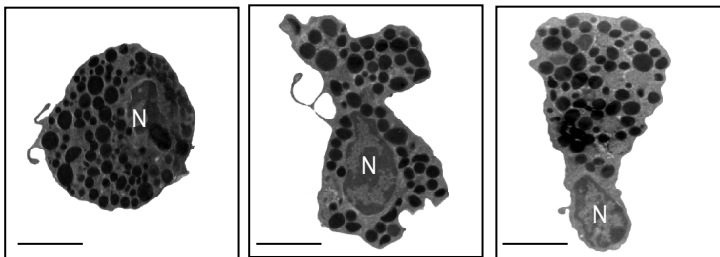

Supplement: blood-2010-03-267419_1.pdf [file blood-2010-03-267419_1.pdf]
